# Supplementary material
Source: Springer Nature journal article supplement (https://www.springermedizin.de/resource/supplementary/12993_2009_216_MOESM5_ESM.pdf/9617310)

0.369

0.369

0.369

5.55  
0.00  
Unit

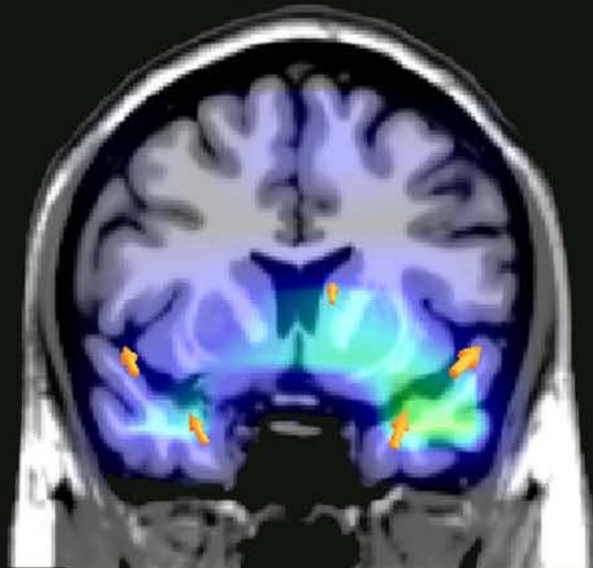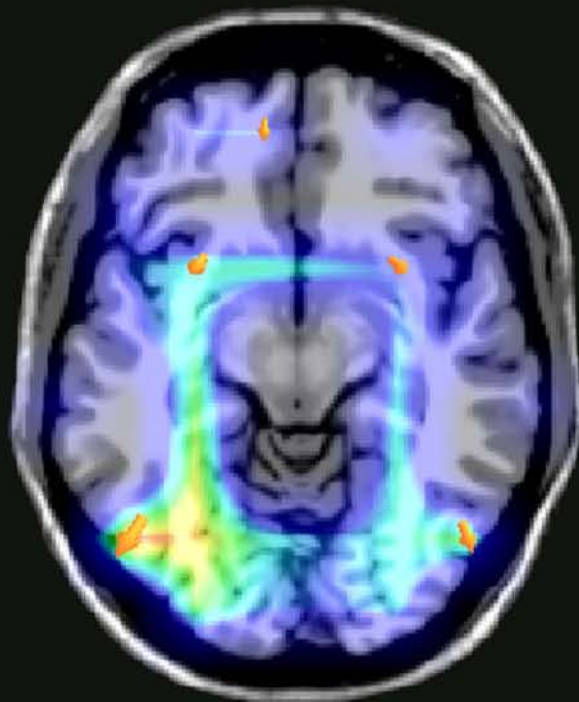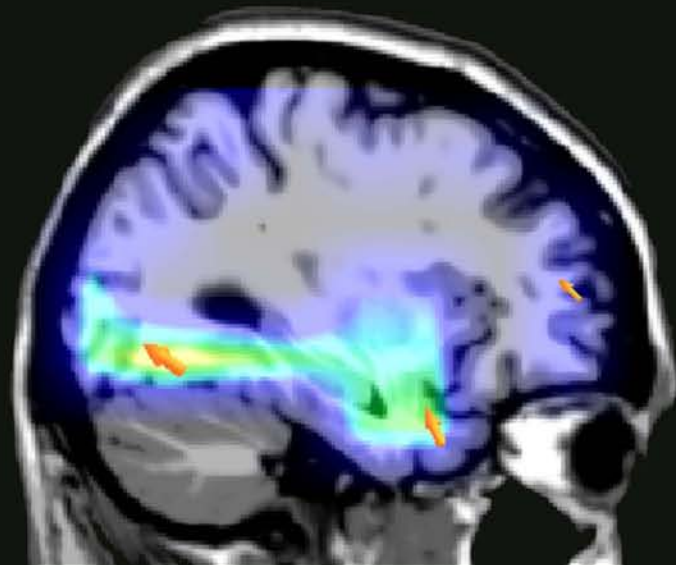

R 137 L

L 63 R

P 123 A

Supplement: MOESM5 [file 9617310]
